# Supplementary material for: How Effective Are Non-Frictional Techniques Compared to Sliding Techniques in the Retraction of Upper Anterior Teeth When Using Buccal Fixed-Appliance Therapy? A Systematic Review
Source: MDPI journal article supplement (doi:10.3390/jcm12216757), 2023-10-25
Supplement: s1 [file s1]

**Table S2: The reasons beyond the judges regarding the risk of bias of the included non-randomized trials**

|                      | Bias due to confounding                                                                          | Bias in selection of participants into the study                                                                                                                                                  | Bias in classification of interventions                                                                          | Bias due to deviations from intended interventions                                                                                              | Bias due to missing data                                                                                                           | Bias in measurement of outcomes                                                                                                                             | Bias in selection of the reported result                                                        | Overall bias         |
|----------------------|--------------------------------------------------------------------------------------------------|---------------------------------------------------------------------------------------------------------------------------------------------------------------------------------------------------|------------------------------------------------------------------------------------------------------------------|-------------------------------------------------------------------------------------------------------------------------------------------------|------------------------------------------------------------------------------------------------------------------------------------|-------------------------------------------------------------------------------------------------------------------------------------------------------------|-------------------------------------------------------------------------------------------------|----------------------|
| Hayashi et al. 2004  | <b>Low risk:</b><br>There are no obvious confounding factors that indicate a clear risk of bias. | <b>Low risk:</b><br>The selection of the participants was made before the start of the intervention. The initiation of follow-up and the start of the intervention coincided for the participants | <b>Low risk:</b><br>The intervention groups were clearly defined.                                                | <b>Low risk:</b><br>Significant co-interventions were balanced across the intervention groups and the intervention was successfully implemented | <b>Serious risk:</b><br>The nature of the missing data means that the risk of bias cannot be removed through appropriate analysis. | <b>Low risk:</b><br>"A 3D surface-scanning system using a slit laser beam was used to measure the series of dental casts."                                  | <b>NI:</b><br>Because the previously registered protocol cannot be accessed                     | <b>Serious risk</b>  |
| Koyama et al. 2011   | <b>Low risk:</b><br>There are no obvious confounding factors that indicate a clear risk of bias. | <b>Moderate risk:</b><br>Selection into the study may have been related to intervention and outcome and the authors used appropriate methods to adjust for the selection bias.                    | <b>Moderate risk:</b><br>Some aspects of the assignments of intervention status were determined retrospectively. | <b>Low risk:</b><br>Any deviations from intended intervention reflected usual practice.                                                         | <b>Low risk:</b><br>Data were reasonably complete                                                                                  | <b>Low risk:</b><br>"The radiographs were traced by one person (RH), and 13 landmarks were identified and digitized with a protractor and digital caliper." | <b>Low risk:</b><br>the study is comparable to a well-performed randomized trial in this domain | <b>Moderate risk</b> |
| Alhadlaq et al. 2016 | <b>Low risk:</b><br>There are no obvious                                                         | <b>Low risk:</b><br>The selection of the participants was                                                                                                                                         | <b>Low risk:</b><br>The intervention                                                                             | <b>Low risk:</b><br>Significant co-interventions                                                                                                | <b>Low risk:</b><br>The analysis addressed                                                                                         | <b>Low risk:</b><br>"All cephalometric                                                                                                                      | <b>Low risk:</b>                                                                                | <b>Low risk</b>      |

|                      |                                                                                                 |                                                                                                                                                                                                                                                                                                                                                            |                                                                                                                                                                                                                                                           |                                                                                                                                                 |                                                                                       |                                                                                                                                                                |                                                                                                                                            |                     |
|----------------------|-------------------------------------------------------------------------------------------------|------------------------------------------------------------------------------------------------------------------------------------------------------------------------------------------------------------------------------------------------------------------------------------------------------------------------------------------------------------|-----------------------------------------------------------------------------------------------------------------------------------------------------------------------------------------------------------------------------------------------------------|-------------------------------------------------------------------------------------------------------------------------------------------------|---------------------------------------------------------------------------------------|----------------------------------------------------------------------------------------------------------------------------------------------------------------|--------------------------------------------------------------------------------------------------------------------------------------------|---------------------|
|                      | confounding factors that indicate a clear risk of bias                                          | made before the start of the intervention. The initiation of follow-up and the start of the intervention coincided for the participants                                                                                                                                                                                                                    | groups were clearly defined.                                                                                                                                                                                                                              | were balanced across the intervention groups and the intervention was successfully implemented                                                  | missing data and is likely to have removed any risk of bias                           | radiographs were digitized using Dolphin imaging software and Ricketts cephalometric analysis was used"                                                        | "Every effort was made to minimize adjustments and to follow the treatment protocol strictly, at least during the canine retraction stage" |                     |
| Makhlouf et al. 2018 | <b>Low risk:</b><br>There are no obvious confounding factors that indicate a clear risk of bias | <b>Low risk:</b><br>The sample for this study comprised of Ten adult patients in a split-mouth design (seven females, three males) with Class I or II division 1 malocclusion, and a treatment plan that necessitates the extraction of maxillary first premolars and retraction of permanent maxillary canines with moderate to minimum anchorage demand. | <b>Low risk:</b><br>Using a ligature wire, the T-loop was inserted and ligated into the right maxillary canine. On the right side, a closing coil spring 8 mm in length was attached to the first molar, and a force of 150 grams was used for retraction | <b>Low risk:</b><br>Significant co-interventions were balanced across the intervention groups and the intervention was successfully implemented | <b>NI:</b><br>There is no information about any missing data or exclusion of patients | <b>Serious risk:</b><br>The outcome measure was subjective And The outcome was assessed by assessors aware of the intervention received by study participants; | <b>NI:</b><br>Because the previously registered protocol cannot be accessed                                                                | <b>Serious risk</b> |

|                    |                                                                                                 |                                                                                                                                                                                                   |                                                                                                                  |                                                                                                                                                 |                                                   |                                                                                                                                                                                                             |                                                                                                 |                      |
|--------------------|-------------------------------------------------------------------------------------------------|---------------------------------------------------------------------------------------------------------------------------------------------------------------------------------------------------|------------------------------------------------------------------------------------------------------------------|-------------------------------------------------------------------------------------------------------------------------------------------------|---------------------------------------------------|-------------------------------------------------------------------------------------------------------------------------------------------------------------------------------------------------------------|-------------------------------------------------------------------------------------------------|----------------------|
| Goyal et al., 2019 | <b>Low risk:</b><br>There are no obvious confounding factors that indicate a clear risk of bias | <b>Low risk:</b><br>The selection of the participants was made before the start of the intervention. The initiation of follow-up and the start of the intervention coincided for the participants | <b>Low risk:</b><br>Intervention status is well-defined                                                          | <b>Low risk:</b><br>Significant co-interventions were balanced across the intervention groups and the intervention was successfully implemented | <b>Low risk:</b><br>Data were reasonably complete | <b>Serious risk:</b><br>The outcome measure was subjective And The outcome was assessed by assessors aware of the intervention received by study participants                                               | <b>NI:</b><br>Because the previously registered protocol cannot be accessed                     | <b>Serious risk</b>  |
| Arvind et al. 2023 | <b>Low risk:</b><br>There are no obvious confounding factors that indicate a clear risk of bias | <b>Moderate risk:</b><br>Selection into the study may have been related to intervention and outcome and the authors used appropriate methods to adjust for the selection bias                     | <b>Moderate risk:</b><br>Some aspects of the assignments of intervention status were determined retrospectively. | <b>Low risk:</b><br>Any deviations from usual practice were unlikely to impact the outcome.                                                     | <b>Low risk:</b><br>Data were reasonably complete | <b>Low risk:</b><br>"The pretreatment and postretraction lateral cephalograms were traced and the discrepancies in landmark location and measurements were resolved by agreement with the principal guide." | <b>Low risk:</b><br>the study is comparable to a well-performed randomized trial in this domain | <b>Moderate risk</b> |

NI: No Information
