# Supplementary material for: How Effective Are Non-Frictional Techniques Compared to Sliding Techniques in the Retraction of Upper Anterior Teeth When Using Buccal Fixed-Appliance Therapy? A Systematic Review
Source: MDPI journal article supplement (doi:10.3390/jcm12216757), 2023-10-25
Supplement: s1 [file s1]

**Table S1: The reasons beyond the judges regarding the risk of bias of the included randomized trials**

| Study                      | Randomization process                                                                                                                                                                                                                   | Deviations from intended interventions                                                                          | Missing outcome data                           | Measurement of the outcome                                                                                                                      | Selection of the reported result                                                                                                                                | Over-all bias        |
|----------------------------|-----------------------------------------------------------------------------------------------------------------------------------------------------------------------------------------------------------------------------------------|-----------------------------------------------------------------------------------------------------------------|------------------------------------------------|-------------------------------------------------------------------------------------------------------------------------------------------------|-----------------------------------------------------------------------------------------------------------------------------------------------------------------|----------------------|
| Ziegler and Ingervall 1989 | <b>Low risk:</b><br>"The canine on one side, chosen at random, was retracted with a canine retraction spring and that on the other side along a labial arch..."<br>There are no indications of a problem with the randomization process | <b>Some concerns:</b><br>The researchers did not report deviations that arose in the course of the experiment   | <b>Low risk:</b><br>No dropouts were reported. | <b>Some concerns:</b><br>"The examiner is the one who applied the two therapeutic interventions and may have been influenced by this knowledge" | <b>Some concerns:</b><br>No information is available about the researchers' pre-specified intentions.                                                           | <b>Some concerns</b> |
| Bakhit et al. 2022         | <b>Low risk:</b><br>" Randomization list was computer-generated using Microsoft Office Excel 2013 sheet. Allocation concealment was performed by co-author (HD) using opaque sealed envelopes..."                                       | <b>Low risk:</b><br>We did not detect deviations from the intended intervention arising from the trial context. | <b>Low risk:</b><br>No dropouts were reported  | <b>Low risk:</b><br>"... the assessors were blinded ..."                                                                                        | <b>Low risk:</b><br>The data were analyzed in accordance with a pre-specified plan that was finalized before unblinded outcome data were available for analysis | <b>Low risk</b>      |
| Tawfik et al. 2022         | <b>Low risk:</b><br>"This study was a two-arm, parallel, single-center, single-blind randomized clinical trial ..."                                                                                                                     | <b>Low risk:</b><br>We did not detect deviations from the intended intervention arising from the trial context. | <b>Low risk:</b><br>No dropouts were reported  | <b>Low risk:</b><br>" Two blinded external assessors carried out the measurements"                                                              | <b>Low risk:</b><br>"The study methodology was approved by the Faculty of Dentistry Ethical Committee, Future University in Egypt ([9]/10-2018). There were no  | <b>Low risk</b>      |

|                      |                                                                                                                                                                                                                                                                                                                         |                                                                                                                            |                                                                                                                                     |                                                                                                                                                                                                                                                                                |                                                                                                                                                                              |                        |
|----------------------|-------------------------------------------------------------------------------------------------------------------------------------------------------------------------------------------------------------------------------------------------------------------------------------------------------------------------|----------------------------------------------------------------------------------------------------------------------------|-------------------------------------------------------------------------------------------------------------------------------------|--------------------------------------------------------------------------------------------------------------------------------------------------------------------------------------------------------------------------------------------------------------------------------|------------------------------------------------------------------------------------------------------------------------------------------------------------------------------|------------------------|
|                      |                                                                                                                                                                                                                                                                                                                         |                                                                                                                            |                                                                                                                                     |                                                                                                                                                                                                                                                                                | changes in methods after trial commencement."                                                                                                                                |                        |
| Sardana et al., 2023 | <p><b>Low risk:</b></p> <p>" The randomization sequence was computer-generated (<a href="https://www.random.org/">https://www.random.org/</a>). Allocation concealment was done using opaque, sealed, and sequentially numbered envelopes. Allocation was handled by an affiliate not involved in any trial stage."</p> | <p><b>Low risk:</b></p> <p>We did not detect deviations from the intended intervention arising from the trial context.</p> | <p><b>Low risk:</b></p> <p>The number of patients completing the trial was consistent with the sample size needed for the study</p> | <p><b>Low risk:</b></p> <p>"The outcome assessor who performed the measurements and the statistician were blinded to treatment allocation. The participants' information was anonymized using non-identifiable codes and removing identifying information at both levels."</p> | <p><b>Low risk"</b></p> <p>The trial was registered at Clinical Trials Registry India, CTRI/2019/01/017231 and the outcomes mentioned in the protocol have been reported</p> | <p><b>Low risk</b></p> |
